# Supplementary material
Source: publisher figshare collection journal article supplement (https://frontiersin.figshare.com/ndownloader/files/17710820)
Supplement: Supplementary file [file 17710820]

**Supplementary Table S3.** T test results on hyperbrain connectivity measures. Statistical results of independent samples t-tests assessing the six functional connectivity measures of the hyperbrain connectivity matrices from the two different types of paired sessions (MATCHED vs. UNMATCHED). From left to right: type of functional connectivity measures, mean and standard deviation of functional connectivity measures for the MATCHED and UNMATCHED skill level groups, t- test value, degrees of freedom, p value, Cohen's d value for independent samples.

| <b>Functional connectivity measures</b> | <b>MATCHED</b> | <b>UNMATCHED</b> | <b>t</b> | <b>df</b> | <b>p</b> | <b>Cohen d</b> |
|-----------------------------------------|----------------|------------------|----------|-----------|----------|----------------|
| <b>G</b>                                | 0.414 ± 0.081  | 0.478 ± 0.113    | 0.835    | 5         | 0.442    | 0.631          |
| <b>C</b>                                | 0.350 ± 0.183  | 0.307 ± 0.179    | 0.319    | 5         | 0.762    | 0.238          |
| <b>SW</b>                               | 0.139 ± 0.061  | 0.145 ± 0.092    | 0.091    | 5         | 0.931    | 0.074          |
| <b>D</b>                                | 0.228 ± 0.009  | 0.243 ± 0.011    | 1.905    | 5         | 0.115    | 1.464          |
| <b>IIR</b>                              | 0.687 ± 0.562  | 0.385 ± 0.078    | 1.093    | 5         | 0.324    | 0.838          |
